# Supplementary material for: Evaluation of circulating tumor cell clusters for pan‐cancer noninvasive diagnostic triaging
Source: PubMed Central journal article supplement — Cancer Cytopathol. 2020 Sep 30;129(3):226–38. doi: 10.1002/cncy.22366 (PMC7984349; doi:10.1002/cncy.22366), 2020-09-30

DAPI

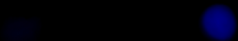

CK7

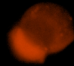

Overlay

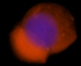

Brightfield

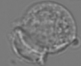

Brightfield + Overlay

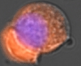

DAPI

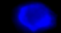

p63

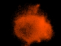

Overlay

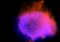

Brightfield

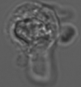

Brightfield + Overlay

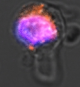

DAPI

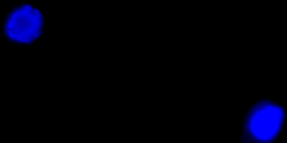

CDX2

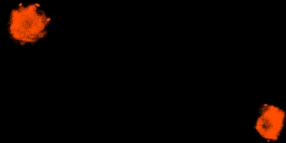

Overlay

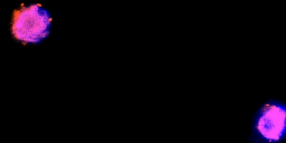

Brightfield

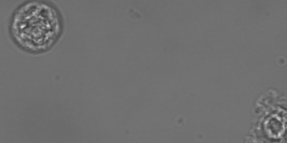

Brightfield + Overlay

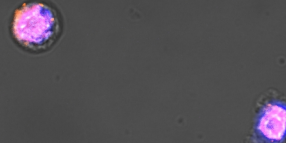

DAPI

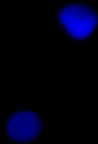

CK20

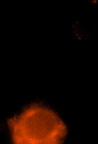

Overlay

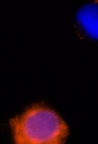

Brightfield

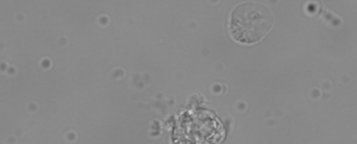

Brightfield + Overlay

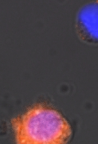

DAPI

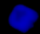

CEA

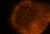

Overlay

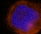

Brightfield

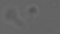

Brightfield + Overlay

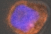

DAPI

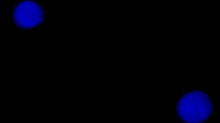

CK7

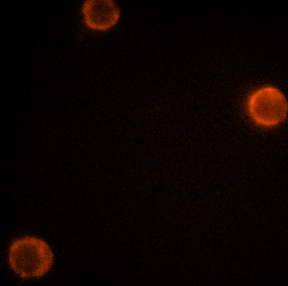

Overlay

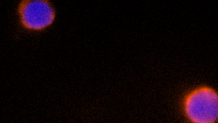

Brightfield

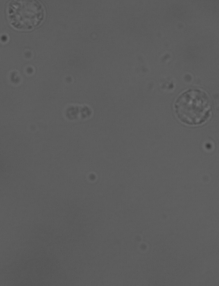

Brightfield + Overlay

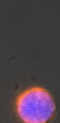

DAPI

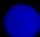

HMWCK

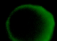

Overlay

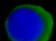

Brightfield

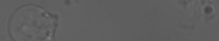

Brightfield + Overlay

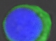

DAPI

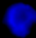

p63

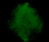

Overlay

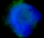

Brightfield

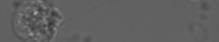

Brightfield + Overlay

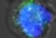

DAPI

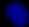

CA-IX

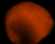

Overlay

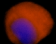

Brightfield

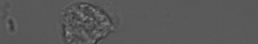

Brightfield + Overlay

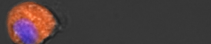

DAPI

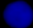

RCC

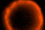

Overlay

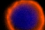

Brightfield

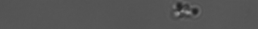

Brightfield + Overlay

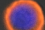

DAPI

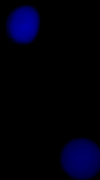

Glypican-3

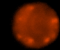

Overlay

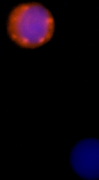

Brightfield

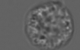

Brightfield + Overlay

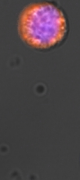

DAPI

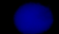

Hep Par1

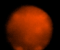

Overlay

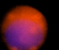

Brightfield

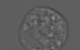

Brightfield + Overlay

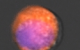

DAPI

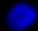

CK5.6

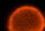

Overlay

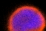

Brightfield

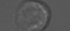

Brightfield + Overlay

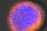

DAPI

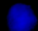

p63

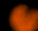

Overlay

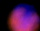

Brightfield

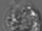

Brightfield + Overlay

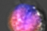

DAPI

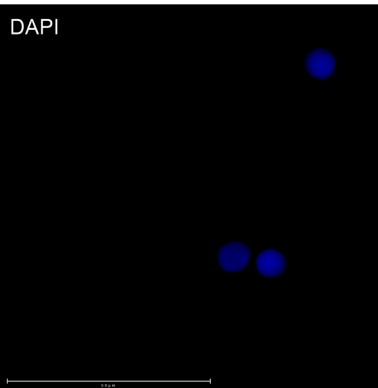

Thyroglobulin

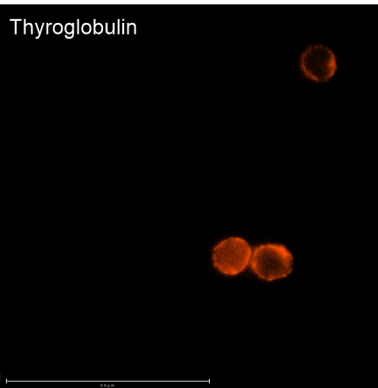

Overlay

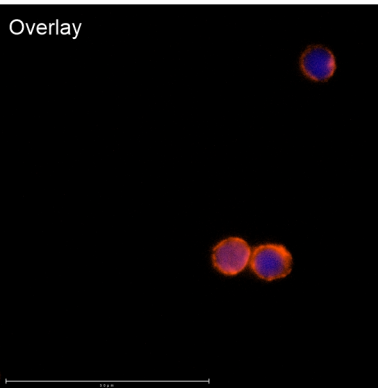

Brightfield

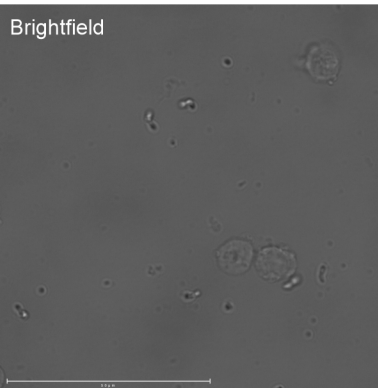

Brightfield + Overlay

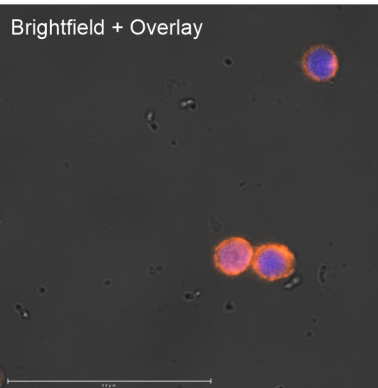

DAPI

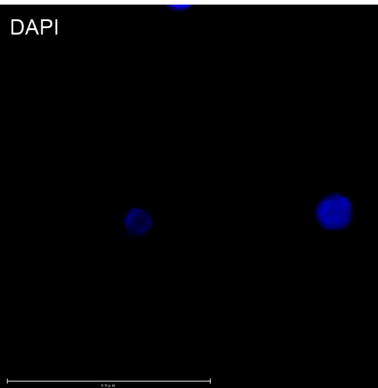

TTF-1

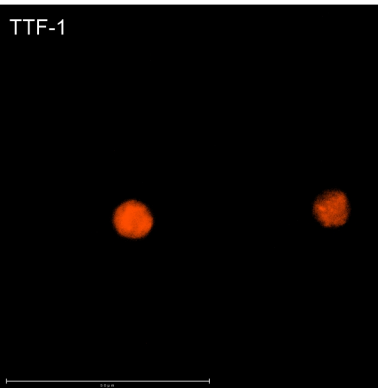

Overlay

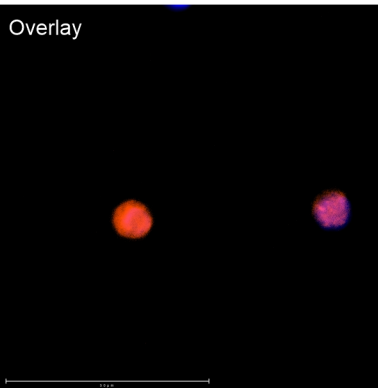

Brightfield

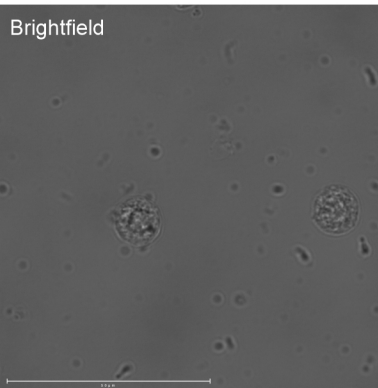

Brightfield + Overlay

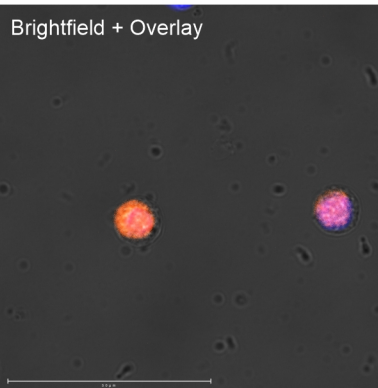



DAPI

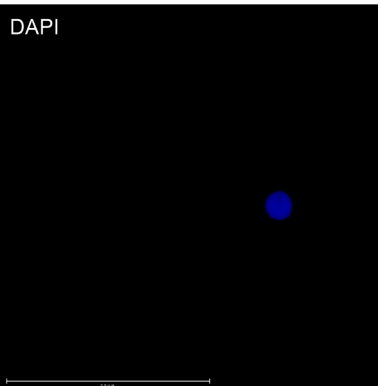

CA125

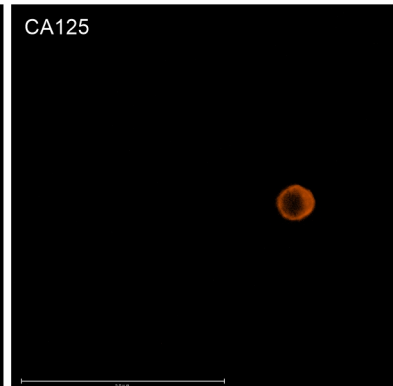

Overlay

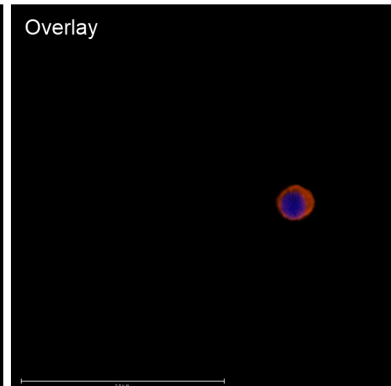

Brightfield

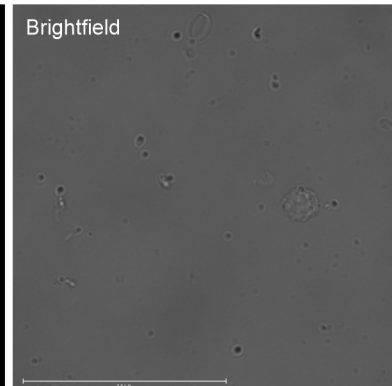

Brightfield + Overlay

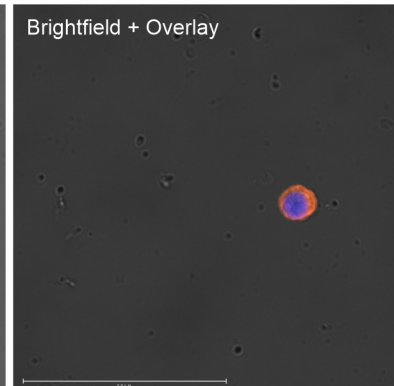

DAPI

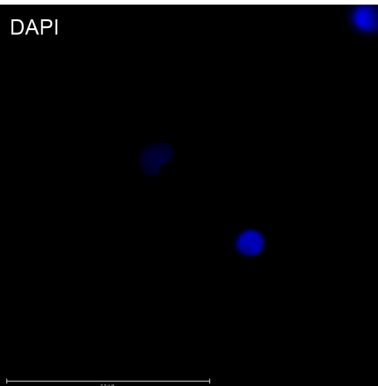

WT-1

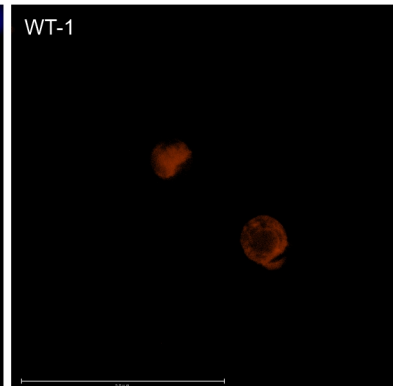

Overlay

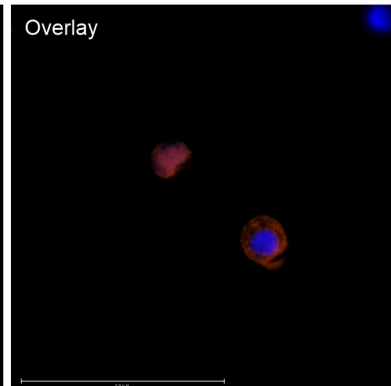

Brightfield

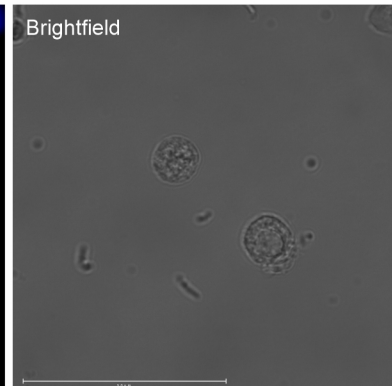

Brightfield + Overlay

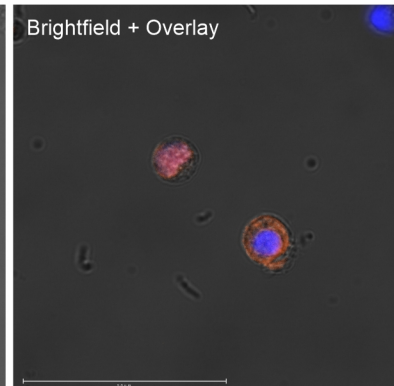

DAPI

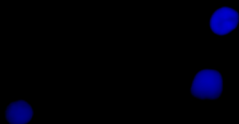

CA19-9

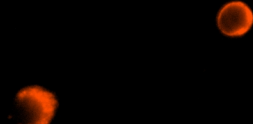

Overlay

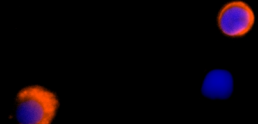

Brightfield

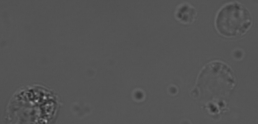

Brightfield + Overlay

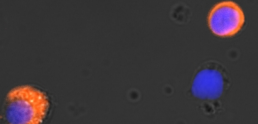

DAPI

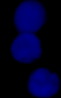

CK19

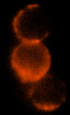

Overlay

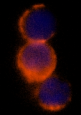

Brightfield

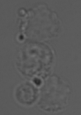

Brightfield + Overlay

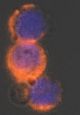

Supplement: CNCY-129-226-s003.pdf [file CNCY-129-226-s003.pdf]
